# Supplementary material for: The first trimester human trophoblast cell line ACH-3P: A novel tool to study autocrine/paracrine regulatory loops of human trophoblast subpopulations – TNF-α stimulates MMP15 expression
Source: PubMed Central journal article supplement (PMC2263055; doi:10.1186/1471-213x-7-137), 2007-12-19
Supplement: 1471-213X-7-137-S3.pdf [file 1471-213X-7-137-S3.pdf]

# Supplementary figures

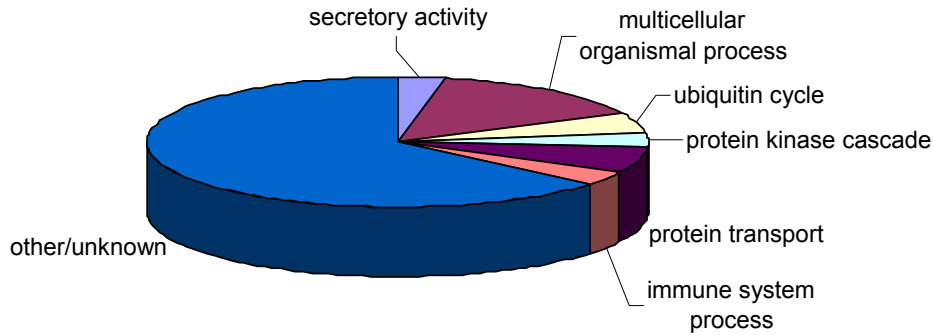

## Supplemental Figure 1: Number of genes – downregulated in JEG-3

619 genes higher expressed in primary trophoblasts and ACH3P as compared to JEG-3 were clustered into 6 characteristic functional categories ( $P < 0.05$ ). The full list of genes is given in the suppl Table 1.

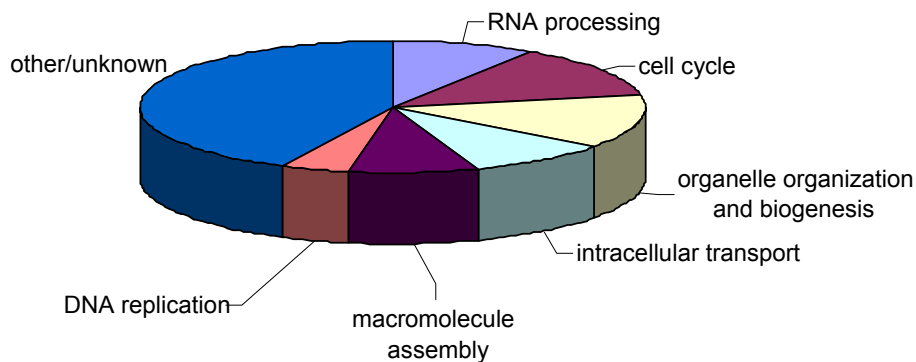

## Supplemental Figure 2: Number of genes-upregulated in JEG3

213 genes higher expressed in JEG-3 as compared to primary trophoblasts and ACH3P were clustered into 6 characteristic functional categories ( $P < 0.05$ ). The full list of genes is given in the suppl Table 2.
